# Supplementary material for: An artificial intelligence approach to monitor student performance and devise preventive measures
Source: Springer Nature journal article supplement (doi:10.1186/s40561-021-00161-y), 2021-09-08
Supplement: MOESM1 [file 19645332]

An Artificial Intelligence Approach to Monitor Student Performance and Devise Preventive Measures

**File: This is the original dataset file.**

@relation DS_151

@attribute Gen {F,M}

@attribute Attendance numeric

@attribute Major {Literature,Translation}

@attribute Year {Year2,Year1,Year3,Year4}

@attribute Session {Evening,Morning}

@attribute Grade-1_Cont numeric

@attribute CGPA numeric

@attribute Sponsorship {Y,N}

@attribute Dorms {Y,N}

@attribute PreReq_Grades numeric

@attribute Final_Grade {High,Low}

@data

F,96.87,Literature,Year2,Evening,90,3.36,Y,Y,83,High

F,93.75,Literature,Year2,Evening,76.7,2.52,N,Y,75,Low

F,95.83,Literature,Year2,Morning,93.3,3.56,Y,Y,90,High

M,96.87,Literature,Year1,Evening,96.7,2.72,Y,N,85,High

M,96.87,Literature,Year1,Evening,100,3.03,Y,N,90,High

F,90.62,Literature,Year2,Evening,76.7,1.96,Y,Y,54,Low

M,100,Literature,Year3,Evening,93.3,2.83,Y,N,80,High

F,93.75,Translation,Year1,Evening,76.7,3.58,Y,Y,85,High

M,84.37,Literature,Year2,Evening,100,3.15,Y,N,78,High

M,96.87,Literature,Year2,Evening,70,2.17,Y,N,70,High

F,89.58,Translation,Year2,Morning,63.3,2.45,N,N,50,Low

F,79.17,Literature,Year2,Morning,66.7,2.36,N,N,75,Low

F,91.67,Literature,Year2,Morning,100,3.39,Y,N,90,High

F,91.67,Translation,Year1,Morning,90,3.17,N,N,76,High

F,89.58,Literature,Year1,Morning,70,2.01,Y,Y,78,Low

F,89.58,Literature,Year2,Morning,83.3,3.74,Y,N,98,High

F,96.87,Literature,Year3,Evening,96.7,2.96,Y,Y,85,High

F,100,Literature,Year2,Morning,73.3,3.06,Y,N,81,High

F,93.75,Literature,Year2,Evening,76.7,2.46,Y,Y,85,Low

F,93.75,Literature,Year1,Evening,93.3,3.74,Y,N,97,High

F,95.83,Literature,Year2,Morning,86.7,3.04,Y,N,71,High

F,100,Literature,Year2,Evening,83.3,2.7,Y,Y,72,High

F,89.58,Translation,Year1,Morning,83.3,2.16,N,N,60,Low

F,93.75,Translation,Year3,Evening,76.7,2.67,Y,N,60,Low

F,93.75,Literature,Year2,Morning,83.3,2.12,N,Y,75,High

F,100,Literature,Year2,Morning,90,2.7,Y,Y,55,High

F,87.5,Literature,Year3,Morning,90,3.17,Y,N,80,High

F,100,Literature,Year2,Evening,96.7,3.12,Y,Y,90,High

F,87.5,Literature,Year2,Evening,66.7,2.03,Y,Y,60,High

F,91.67,Literature,Year2,Morning,93.3,2.87,N,Y,57,High

F,90.62,Literature,Year1,Evening,76.7,2.58,Y,Y,56,Low

M,90.62,Literature,Year2,Evening,93.3,3.18,N,N,87,High

F,100,Literature,Year3,Evening,90,3.33,Y,Y,90,High

F,100,Literature,Year2,Morning,76.7,3.02,Y,N,60,High

F,97.92,Literature,Year1,Morning,96.7,2.41,N,Y,65,High

F,91.67,Literature,Year1,Morning,93.3,3.75,N,N,85,High

F,93.75,Literature,Year2,Evening,83.3,2.3,Y,N,86,Low

F,100,Translation,Year1,Morning,90,3.62,N,N,90,High

F,96.87,Literature,Year1,Evening,90,3.25,Y,Y,90,High

F,100,Literature,Year1,Evening,83.3,1.82,Y,Y,55,Low

F,95.83,Literature,Year2,Morning,83.3,1.92,Y,N,50,Low

F,100,Literature,Year3,Morning,80,3.04,Y,N,83,High

F,100,Literature,Year2,Evening,70,2.51,N,N,80,High

F,87.5,Literature,Year2,Morning,83.3,2.89,N,N,61,High

F,100,Translation,Year2,Morning,86.7,3.27,Y,N,77,High

F,83.33,Literature,Year2,Morning,83.3,3.22,Y,Y,86.5,High

F,89.58,Translation,Year2,Morning,80,3.22,Y,N,77,High

F,97.92,Literature,Year2,Morning,93.3,2.87,Y,Y,83,High

F,87.5,Literature,Year2,Morning,93.3,3.19,Y,N,76.5,High

F,93.75,Literature,Year2,Morning,80,2.78,Y,N,87,High

F,95.83,Literature,Year2,Morning,70,3.13,Y,N,83,High

M,96.87,Literature,Year2,Evening,76.7,2,N,N,80,High

F,100,Literature,Year3,Evening,83.3,3.18,Y,Y,84,High

F,100,Literature,Year1,Morning,86.7,2.87,N,N,81.5,High

F,100,Literature,Year2,Evening,83.3,1.81,Y,Y,56,High

F,96.87,Literature,Year4,Evening,73.3,2.68,Y,Y,62,High

F,81.25,Literature,Year3,Evening,86.7,3.2,Y,Y,87,High

F,89.58,Literature,Year2,Morning,66.7,2.38,Y,Y,70,Low

F,97.92,Literature,Year2,Morning,76.7,2.05,N,N,71,High

F,91.67,Translation,Year2,Morning,80,2.13,Y,Y,70,Low

F,95.83,Literature,Year4,Morning,73.3,2.87,Y,Y,66,High

F,90.62,Literature,Year3,Evening,80,2.69,Y,Y,55,Low

F,87.5,Literature,Year2,Evening,76.7,2.55,Y,Y,67,High

F,100,Translation,Year1,Evening,90,2.77,Y,Y,76,Low

F,93.75,Literature,Year1,Morning,93.3,3.07,Y,Y,81,High

F,97.92,Literature,Year2,Morning,100,3.51,N,Y,95,High

F,100,Literature,Year1,Morning,76.7,3.12,Y,N,90,High

F,93.75,Literature,Year4,Evening,90,3.1,Y,Y,80,High

F,93.75,Translation,Year2,Evening,73.3,2.89,Y,Y,90,High

F,93.75,Literature,Year2,Evening,73.3,2.21,Y,N,85,High

F,89.58,Literature,Year2,Morning,90,3.24,Y,N,76.5,High

F,95.83,Literature,Year2,Morning,93.3,2.92,Y,Y,71,High

F,95.83,Literature,Year2,Morning,63.3,2.01,N,Y,60,Low

F,90.62,Literature,Year2,Evening,80,2.89,Y,Y,85,High

F,91.67,Translation,Year3,Morning,83.3,3.14,Y,N,88,High

F,97.92,Translation,Year2,Morning,83.3,3.34,Y,N,86,High

M,96.87,Literature,Year2,Evening,80,2.37,Y,N,80,High

F,90.62,Literature,Year2,Evening,76.7,2.12,Y,Y,54,High

F,97.92,Literature,Year2,Morning,100,3.93,Y,N,99,High

F,93.75,Literature,Year1,Evening,96.7,3.55,Y,Y,90,High

F,100,Translation,Year4,Morning,96.7,3.63,Y,N,95,High

F,96.87,Translation,Year1,Evening,100,3.6,Y,N,87.5,High

F,90.62,Literature,Year3,Evening,76.7,2.6,Y,N,65,Low

F,95.83,Literature,Year1,Morning,76.7,2.93,Y,N,71,High

F,100,Literature,Year2,Evening,96.7,3.37,Y,Y,90,High

F,100,Translation,Year3,Morning,83.3,2.7,Y,Y,78,High

F,97.92,Translation,Year2,Morning,83.3,2.67,Y,N,70,High

F,93.75,Translation,Year2,Morning,96.7,3.64,N,N,99,High

F,90.62,Literature,Year1,Evening,76.7,3.12,Y,Y,80,High

F,96.87,Literature,Year3,Evening,83.3,2.28,Y,Y,61,Low

M,87.5,Translation,Year2,Evening,93.3,3.31,Y,N,81,High

M,100,Literature,Year2,Evening,83.3,2.79,Y,N,80,High

M,100,Translation,Year3,Evening,83.3,3.54,N,N,80,High

M,100,Literature,Year1,Evening,86.7,2.7,Y,N,82,High

F,91.67,Literature,Year2,Morning,80,2.29,Y,N,51,Low

F,97.92,Literature,Year1,Morning,100,3.85,Y,N,94,High

F,97.92,Literature,Year2,Morning,90,3.13,Y,Y,80,High

F,100,Translation,Year1,Evening,83.3,3.77,Y,N,91,High

F,93.75,Literature,Year2,Evening,70,2.56,Y,Y,85,Low

F,93.75,Literature,Year2,Morning,93.3,3.17,Y,Y,90,High

F,90.62,Literature,Year1,Evening,73.3,2.94,Y,N,65,Low

F,95.83,Literature,Year3,Morning,86.7,3.59,Y,N,96,High

F,90.62,Literature,Year2,Evening,76.7,2.31,Y,N,73,Low

F,87.5,Literature,Year2,Evening,76.7,2.41,Y,N,50,Low

M,100,Literature,Year2,Evening,100,3.16,N,N,70,High

F,97.92,Translation,Year2,Morning,96.7,3.11,Y,N,90,High

F,87.5,Literature,Year3,Morning,76.7,2.4,Y,N,56,Low

F,97.92,Literature,Year2,Morning,96.7,2.88,N,N,74,High

F,97.92,Translation,Year1,Morning,93.3,3.67,Y,N,90,High

F,97.92,Translation,Year2,Morning,86.7,2.88,N,N,64,High

F,91.67,Literature,Year2,Morning,73.3,2.95,Y,N,75.5,High

F,100,Literature,Year2,Evening,76.7,2.98,N,Y,65,High

F,95.83,Literature,Year3,Morning,93.3,3.28,Y,Y,90,High

F,96.87,Literature,Year2,Evening,93.3,2.8,Y,Y,70,High

F,84.37,Literature,Year3,Evening,80,2.75,Y,Y,70,Low

F,77.08,Translation,Year4,Morning,93.3,2.2,Y,N,50,Low

M,100,Literature,Year2,Evening,96.7,2.29,Y,N,65.5,High

F,95.83,Literature,Year2,Morning,86.7,2.7,Y,Y,70,Low

F,100,Literature,Year2,Morning,90,2.96,Y,Y,90,High

F,97.92,Literature,Year1,Morning,66.7,2.78,N,Y,71,Low

F,85.42,Literature,Year2,Morning,80,2.89,Y,N,70,High

F,93.75,Literature,Year2,Evening,80,2.28,Y,Y,49.5,Low

F,95.83,Literature,Year1,Morning,90,2.85,Y,Y,82,High

M,96.87,Literature,Year2,Evening,70,2.02,N,N,51,High

F,100,Literature,Year3,Morning,100,3.71,Y,N,96,High

F,93.75,Literature,Year3,Morning,80,3.44,Y,N,80,High

F,96.87,Literature,Year1,Evening,96.7,3.36,Y,N,87,High

F,96.87,Literature,Year2,Evening,76.7,2.67,Y,Y,86,Low

F,93.75,Literature,Year2,Morning,93.3,2.75,N,N,78,High

F,95.83,Literature,Year2,Morning,76.7,3.14,Y,N,65,High

F,90.62,Literature,Year1,Evening,93.3,3.78,Y,Y,95,High

F,89.58,Literature,Year2,Morning,83.3,2.04,N,N,82,Low

F,93.75,Translation,Year2,Evening,83.3,3.57,Y,N,91,High

F,93.75,Literature,Year2,Evening,80,1.51,Y,N,62,High

M,87.5,Translation,Year3,Evening,56.7,2.24,Y,N,77,Low

F,91.67,Literature,Year3,Morning,83.3,2.83,Y,Y,76,High

F,100,Literature,Year2,Morning,86.7,3.18,Y,N,83,High

F,97.92,Literature,Year2,Morning,100,3.86,Y,N,92.5,High

F,97.92,Literature,Year2,Morning,100,3.82,Y,N,98,High

F,100,Literature,Year2,Evening,96.7,2.52,Y,Y,76,High

F,93.75,Literature,Year2,Morning,100,3.44,Y,N,87,High

F,89.58,Literature,Year4,Morning,73.3,2.8,Y,Y,80,High

F,96.87,Literature,Year2,Evening,76.7,2.32,Y,Y,72,High

F,100,Literature,Year3,Evening,83.3,2.84,Y,Y,82,High

M,96.87,Literature,Year2,Evening,96.7,1.9,N,N,81,High

M,100,Literature,Year2,Evening,90,2.61,Y,N,83,High

F,95.83,Literature,Year2,Morning,70,2.2,N,N,60,Low

F,95.83,Literature,Year2,Morning,70,2.22,Y,N,75,High

F,89.58,Literature,Year3,Morning,80,2.07,Y,Y,78,Low

F,93.75,Literature,Year2,Morning,80,3.89,Y,Y,90,High

F,95.83,Literature,Year1,Morning,80,1.78,Y,Y,50,Low
