# Supplementary material for: An artificial intelligence approach to monitor student performance and devise preventive measures
Source: Springer Nature journal article supplement (doi:10.1186/s40561-021-00161-y), 2021-09-08
Supplement: MOESM2 [file 19645332]

An Artificial Intelligence Approach to Monitor Student Performance and Devise Preventive Measures

**File: This is the preprocessed dataset file.**

@relation 'DS_151-weka.filters.unsupervised.attribute.Remove-R1,3-5,8-9'

@attribute Attendance numeric

@attribute Grade-1_Cont numeric

@attribute CGPA numeric

@attribute PreReq_Grades numeric

@attribute Final_Grade {High,Low}

@data

96.87,90,3.36,83,High

93.75,76.7,2.52,75,Low

95.83,93.3,3.56,90,High

96.87,96.7,2.72,85,High

96.87,100,3.03,90,High

90.62,76.7,1.96,54,Low

100,93.3,2.83,80,High

93.75,76.7,3.58,85,High

84.37,100,3.15,78,High

96.87,70,2.17,70,High

89.58,63.3,2.45,50,Low

79.17,66.7,2.36,75,Low

91.67,100,3.39,90,High

91.67,90,3.17,76,High

89.58,70,2.01,78,Low

89.58,83.3,3.74,98,High

96.87,96.7,2.96,85,High

100,73.3,3.06,81,High

93.75,76.7,2.46,85,Low

93.75,93.3,3.74,97,High

95.83,86.7,3.04,71,High

100,83.3,2.7,72,High

89.58,83.3,2.16,60,Low

93.75,76.7,2.67,60,Low

93.75,83.3,2.12,75,High

100,90,2.7,55,High

87.5,90,3.17,80,High

100,96.7,3.12,90,High

87.5,66.7,2.03,60,High

91.67,93.3,2.87,57,High

90.62,76.7,2.58,56,Low

90.62,93.3,3.18,87,High

100,90,3.33,90,High

100,76.7,3.02,60,High

97.92,96.7,2.41,65,High

91.67,93.3,3.75,85,High

93.75,83.3,2.3,86,Low

100,90,3.62,90,High

96.87,90,3.25,90,High

100,83.3,1.82,55,Low

95.83,83.3,1.92,50,Low

100,80,3.04,83,High

100,70,2.51,80,High

87.5,83.3,2.89,61,High

100,86.7,3.27,77,High

83.33,83.3,3.22,86.5,High

89.58,80,3.22,77,High

97.92,93.3,2.87,83,High

87.5,93.3,3.19,76.5,High

93.75,80,2.78,87,High

95.83,70,3.13,83,High

96.87,76.7,2,80,High

100,83.3,3.18,84,High

100,86.7,2.87,81.5,High

100,83.3,1.81,56,High

96.87,73.3,2.68,62,High

81.25,86.7,3.2,87,High

89.58,66.7,2.38,70,Low

97.92,76.7,2.05,71,High

91.67,80,2.13,70,Low

95.83,73.3,2.87,66,High

90.62,80,2.69,55,Low

87.5,76.7,2.55,67,High

100,90,2.77,76,Low

93.75,93.3,3.07,81,High

97.92,100,3.51,95,High

100,76.7,3.12,90,High

93.75,90,3.1,80,High

93.75,73.3,2.89,90,High

93.75,73.3,2.21,85,High

89.58,90,3.24,76.5,High

95.83,93.3,2.92,71,High

95.83,63.3,2.01,60,Low

90.62,80,2.89,85,High

91.67,83.3,3.14,88,High

97.92,83.3,3.34,86,High

96.87,80,2.37,80,High

90.62,76.7,2.12,54,High

97.92,100,3.93,99,High

93.75,96.7,3.55,90,High

100,96.7,3.63,95,High

96.87,100,3.6,87.5,High

90.62,76.7,2.6,65,Low

95.83,76.7,2.93,71,High

100,96.7,3.37,90,High

100,83.3,2.7,78,High

97.92,83.3,2.67,70,High

93.75,96.7,3.64,99,High

90.62,76.7,3.12,80,High

96.87,83.3,2.28,61,Low

87.5,93.3,3.31,81,High

100,83.3,2.79,80,High

100,83.3,3.54,80,High

100,86.7,2.7,82,High

91.67,80,2.29,51,Low

97.92,100,3.85,94,High

97.92,90,3.13,80,High

100,83.3,3.77,91,High

93.75,70,2.56,85,Low

93.75,93.3,3.17,90,High

90.62,73.3,2.94,65,Low

95.83,86.7,3.59,96,High

90.62,76.7,2.31,73,Low

87.5,76.7,2.41,50,Low

100,100,3.16,70,High

97.92,96.7,3.11,90,High

87.5,76.7,2.4,56,Low

97.92,96.7,2.88,74,High

97.92,93.3,3.67,90,High

97.92,86.7,2.88,64,High

91.67,73.3,2.95,75.5,High

100,76.7,2.98,65,High

95.83,93.3,3.28,90,High

96.87,93.3,2.8,70,High

84.37,80,2.75,70,Low

77.08,93.3,2.2,50,Low

100,96.7,2.29,65.5,High

95.83,86.7,2.7,70,Low

100,90,2.96,90,High

97.92,66.7,2.78,71,Low

85.42,80,2.89,70,High

93.75,80,2.28,49.5,Low

95.83,90,2.85,82,High

96.87,70,2.02,51,High

100,100,3.71,96,High

93.75,80,3.44,80,High

96.87,96.7,3.36,87,High

96.87,76.7,2.67,86,Low

93.75,93.3,2.75,78,High

95.83,76.7,3.14,65,High

90.62,93.3,3.78,95,High

89.58,83.3,2.04,82,Low

93.75,83.3,3.57,91,High

93.75,80,1.51,62,High

87.5,56.7,2.24,77,Low

91.67,83.3,2.83,76,High

100,86.7,3.18,83,High

97.92,100,3.86,92.5,High

97.92,100,3.82,98,High

100,96.7,2.52,76,High

93.75,100,3.44,87,High

89.58,73.3,2.8,80,High

96.87,76.7,2.32,72,High

100,83.3,2.84,82,High

96.87,96.7,1.9,81,High

100,90,2.61,83,High

95.83,70,2.2,60,Low

95.83,70,2.22,75,High

89.58,80,2.07,78,Low

93.75,80,3.89,90,High

95.83,80,1.78,50,Low
